# Supplementary material
Source: PubMed Central journal article supplement (PMC3024043)
Supplement: supp_ddq512_ddq512supp.pdf [file supp_ddq512_ddq512supp.pdf]

**Supplementary Table 1.**

| Primary Antibody | Secondary Antibody | Dilution | Company        | Mol wt  |
|------------------|--------------------|----------|----------------|---------|
|                  |                    |          |                |         |
| pCREB            | Rabbit mAb         | 1:1000   | Cell Signaling | 43 kD   |
| Akt              | Rabbit pAb         | 1:800    | Cell Signaling | 60kD    |
| pAkt             | Rabbit mAb         | 1:800    | Cell Signaling | 60kD    |
| DARPP32          | Rabbit pAb         | 1:200    | Abcam          | 32kD    |
| Hsp 70           | Mouse mAb          | 1:1500   | Abcam          | 70-78kD |
| Hsp 40           | Rabbit pAb         | 1:1500   | Abcam          | 40kD    |
| Hsf1             | Rabbit pAb         | 1:500    | Abcam          | 83kD    |
| pTrkB            | Rabbit pAb         | 1:1000   | Abcam          | 92kD    |
| TrkB             | Rabbit pAb         | 1:1000   | Santa Cruz     | 92 kD   |
| PGC1 $\infty$    | Rabbit pAb         | 1:5000   | Santa Cruz     | 85-90kD |
| Grp78            | Mouse mAb          | 1:1000   | Santa Cruz     | 78kD    |
| BDNF             | Rabbit pAb         | 1:1000   | Santa Cruz     | <20kD   |

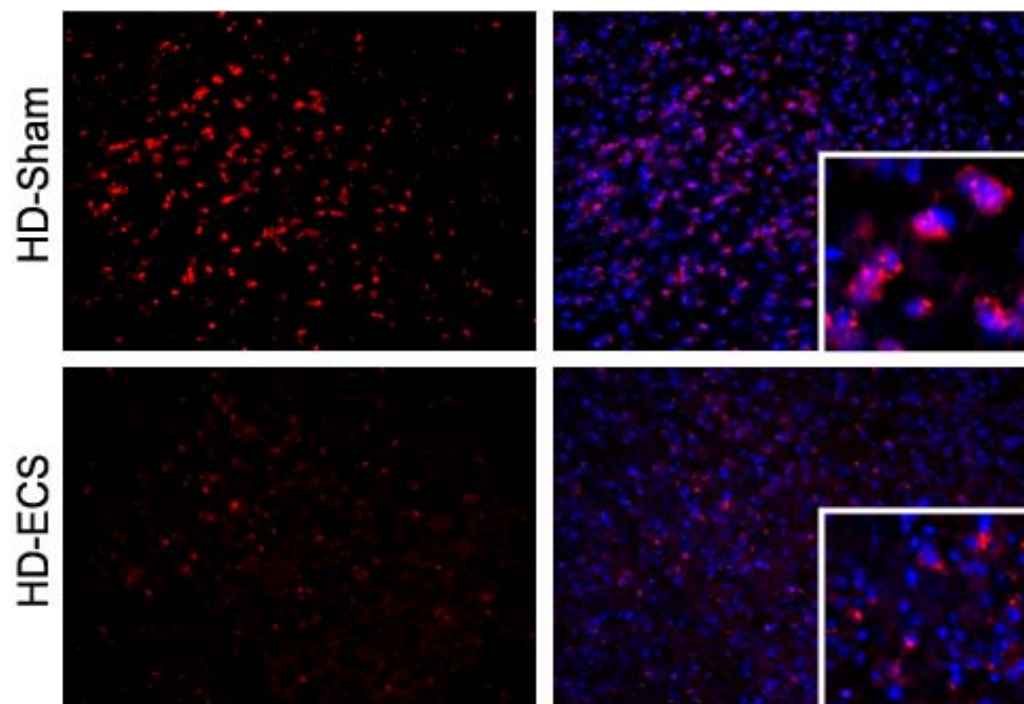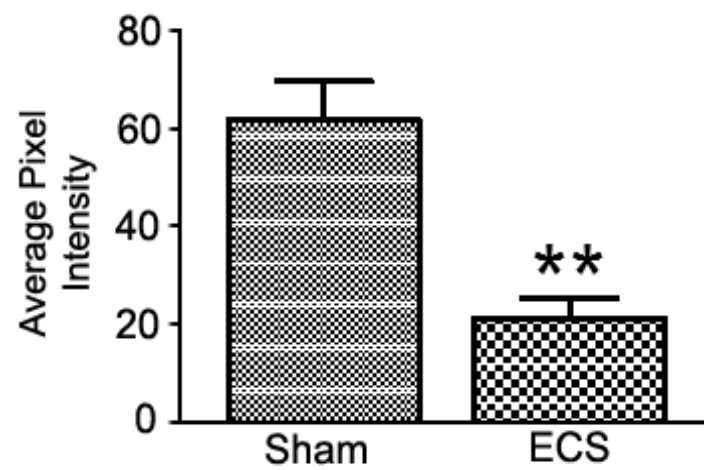

**Supplementary Figure 1. ECS treatment attenuates Htt aggregation in cortex of HD mice.** Representative images showing huntingtin (Htt) immunoreactive aggregates in the cortex (red; left micrographs; scale bar = 250 mm) stained with EM48 antibody and results of densitometric analysis of EM48 immunoreactivity (right graph) in 16 week-old N171-82Q HD mice in ECS- and sham-treated groups. Values are the mean and SEM (n = 9-10 mice per group). \*\*p<0.01.

HD - Sham

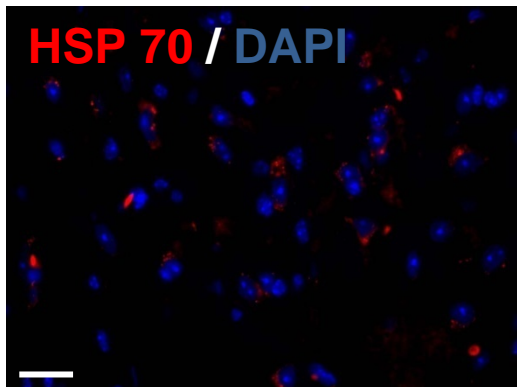

HD - ECS

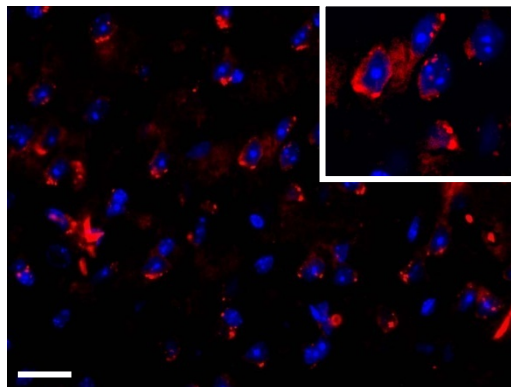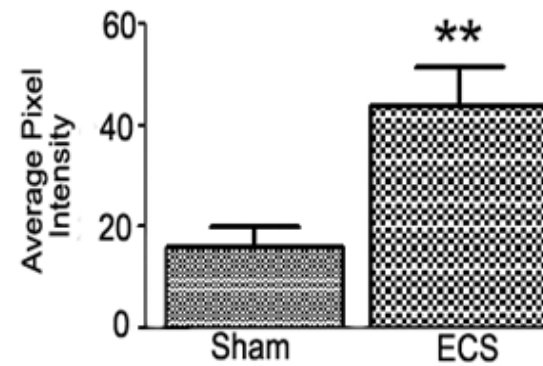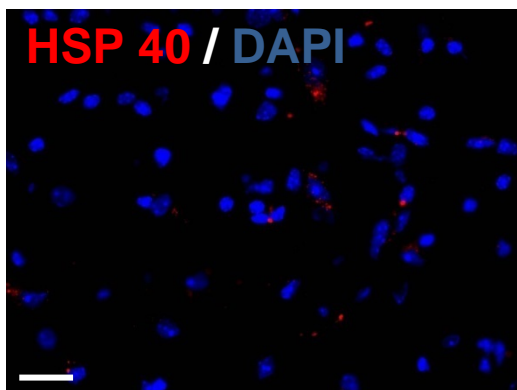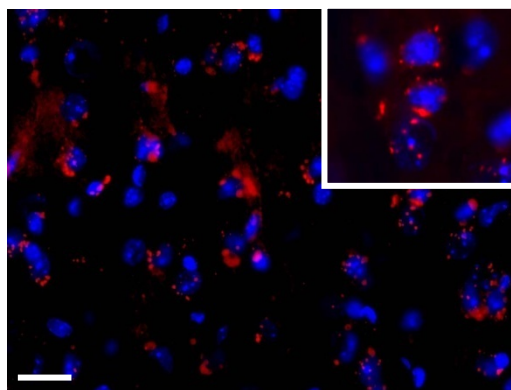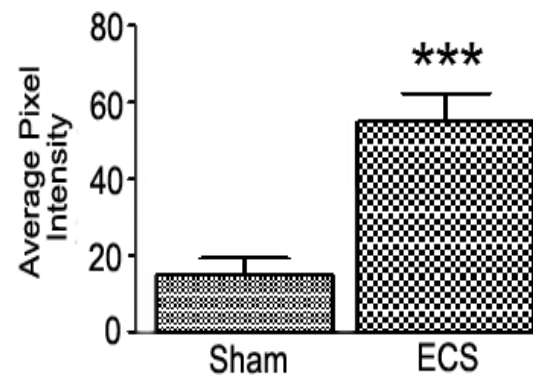

Striatum

**Supplementary Figure 2. Levels of protein chaperones are elevated in striatal cells of HD mice treated with ECS.** Images showing HSP70 and HSP40 immunoreactivities (red in micrographs at right) and results of densitometric analysis of immunoreactivities (graphs) in 16 week-old HD mice in ECS or sham control treatment groups. Values are the mean and SEM (n = 10 mice per group). \*\*p<0.01, \*\*\*p<0.001. Scale bar = 20 micrometers.

HD -Sham

HD -ECS

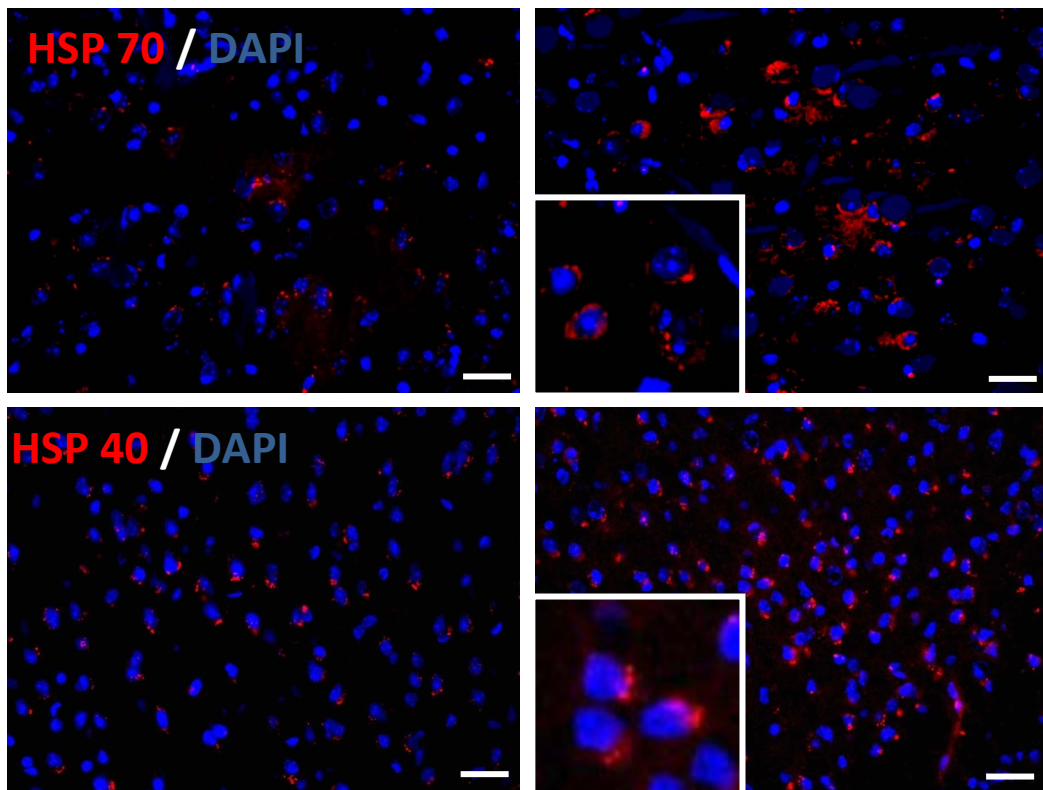

Cortex

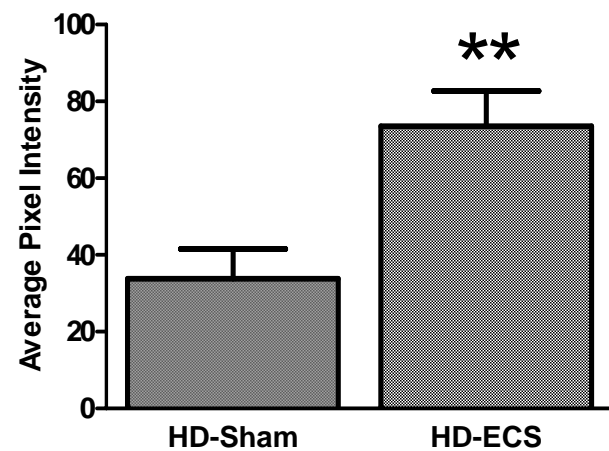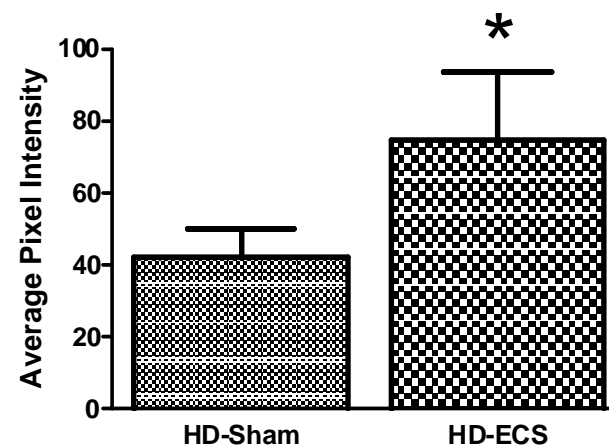

**Supplementary Figure 3. Levels of protein chaperones are elevated in cortical cells of HD mice treated with ECS.** Images showing HSP70 and HSP40 immunoreactivities (red in micrographs at right) and results of densitometric analysis of immunoreactivities (graphs) in 16 week-old HD mice in ECS or sham control treatment groups. Values are the mean and SEM (n = 10 mice per group). \*p<0.05, \*\*p<0.01. Scale bar = 20 micrometers.
